# Supplementary material
Source: publisher figshare collection journal article supplement (https://acs.figshare.com/ndownloader/files/3974713)
Supplement: Supplementary file 1 [file 3974713]

**Input and Output Files:**

Each tool in the Proteomic-Genomic Nexus uses different input and output files for its purpose, some of which are optional. A summary of the input and output files used in the Proteomic-Genomic Nexus software package is shown in Supplementary Tables 1 and 2.

| <b>Supplementary Table 1: Input files used by each of the tools in the Proteomic-Genomic Nexus software package.</b> |                   |                        |          |                  |
|----------------------------------------------------------------------------------------------------------------------|-------------------|------------------------|----------|------------------|
|                                                                                                                      | Protein Generator | Virtual Protein Merger | Samifier | Results Analyzer |
| Gene prediction file in Glimmer3 format                                                                              | x                 |                        |          |                  |
| Translation table in NCBI format                                                                                     | x                 | x                      |          |                  |
| Genome sequence in FASTA format                                                                                      | x                 | x                      | x        | x                |
| Annotation results in GFF3 format                                                                                    |                   | x                      | x        | x                |
| Mascot search results in .dat or .mzIdentML format (versions 1.0 or 1.1 supported)                                   |                   | x                      | x        | x                |
| A text file mapping protein IDs to ordered locus name                                                                |                   |                        | x        | x                |
| File containing pre-built SQL queries                                                                                |                   |                        |          | x                |

| <b>Supplementary Table 2: Output files produced by each of the tools in the Proteomic-Genomic Nexus software package.</b> |                   |                        |          |                  |
|---------------------------------------------------------------------------------------------------------------------------|-------------------|------------------------|----------|------------------|
|                                                                                                                           | Protein Generator | Virtual Protein Merger | Samifier | Results Analyzer |
| Protein database in FASTA format                                                                                          | x                 |                        |          |                  |
| A text file mapping protein IDs to ordered locus name                                                                     | x                 |                        |          |                  |
| Annotation results in GFF3 format                                                                                         | x                 | x                      |          |                  |
| Sequence alignment file in SAM format                                                                                     |                   |                        | x        |                  |
| Regions of interest in BED format                                                                                         |                   |                        | x        |                  |
| A text file which describes reported errors                                                                               |                   |                        | x        |                  |
| A table file of the sequence alignment SAM file                                                                           |                   |                        |          | x                |

**Supplementary Table 3. Mascot identity threshold scores for analysis of two strains of *Campylobacter concisus***

| Mascot protein sequence database                             | Mascot threshold score for each strain                |                                                                        |
|--------------------------------------------------------------|-------------------------------------------------------|------------------------------------------------------------------------|
|                                                              | <i>C. concisus</i> strain 13826 (RefSeq: NC_009802.1) | <i>C. concisus</i> strain UNSWCD (RefSeq: AENQ01000001 - AENQ01000086) |
| NCBI RefSeq [1]                                              | 6                                                     | 7                                                                      |
| Genes predicted by Glimmer [2]                               | 7                                                     | 6                                                                      |
| Six-frame translation of genome by Virtual Protein Generator | 25                                                    | 25                                                                     |

The screenshot displays the Galaxy web interface. On the left, the 'Tools' panel shows the 'Get Data' section with a red circle around 'Upload File from your computer' (labeled a). The main panel shows the 'Results Analyser (version 1.0.1)' tool configuration (labeled b). The configuration includes: 'Select chromosome tar file: 1: yeast\_chromosomes.tar', 'Select genome file: 3: saccharomyces\_cer.0110208.gff', 'Select Mascot search result: 8: de\_godoy\_dat\_data.dat', and 'Select file mapping: 2: accession.txt'. The right panel shows the 'History' section (labeled c) with a list of output files: '9: Samifier on data 2, data 3, and others', '8: de\_godoy\_dat\_data.dat', '3: saccharomyces\_cerevisiae R64-1-1\_2 0110208.gff', '2: accession.txt', and '1: yeast\_chromosomes.tar'.

**Supplementary Figure 1. Graphical user interface of Results Analyser in Galaxy. a)** A hyperlink to an interface to upload the input files. **b)** Users can then run the Results Analyser tool by selecting their files from the drop-down menus and applying filters through customized SQL queries. **c)** Output files that are ready for download are listed in the right-most panel.

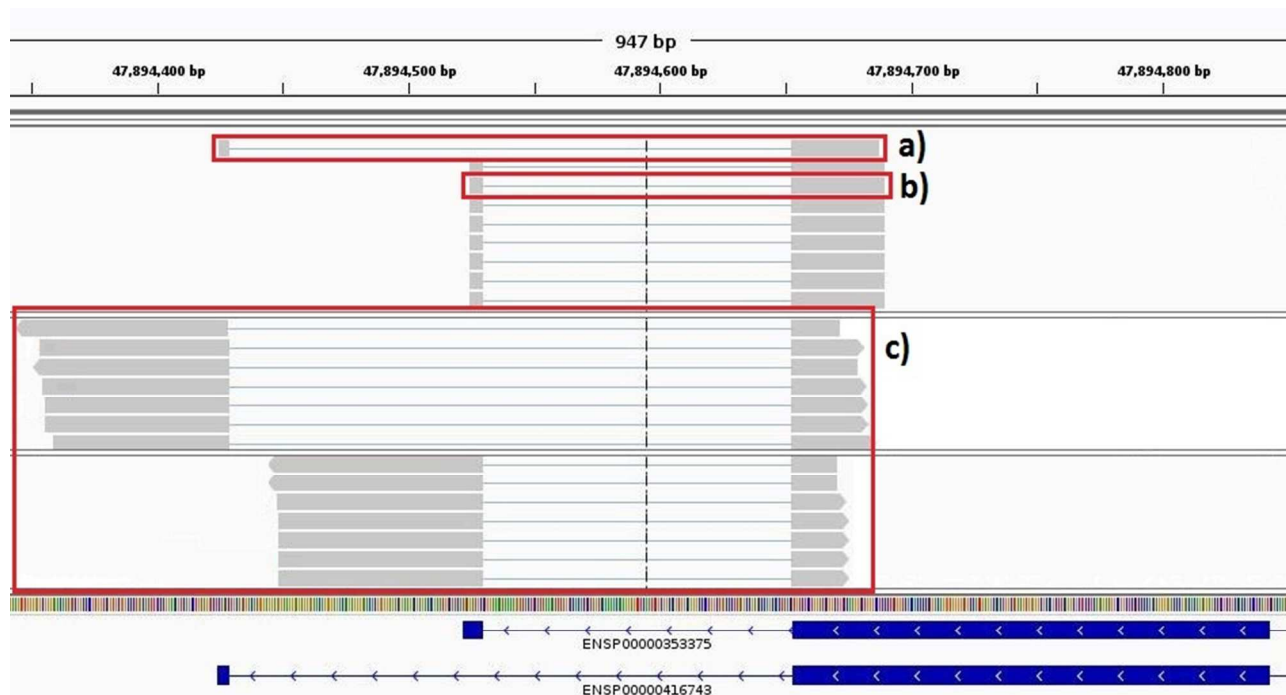

**Supplementary Figure 2. Alternative splicing of human microtubule 4, confirmed by RNA-seq and GeLC-MS/MS.** **a)** A peptide of sequence EAQTLDSQIQETSI was found to span the splice junction of one isoform of this protein (ENSP00000353375). This peptide had a Mascot peptide score of 88. **b)** A different peptide, of sequence EAQTLDSQIQETN, was found to span across an alternative splice junction for another isoform (ENSP00000416743). This peptide had a score of 63. The gene structure and splicing pattern for each isoform from the Ensembl database is shown in the blue tracks below. **c)** RNA-seq reads confirm the two alternatively spliced junctions. RNA reads that do not span across splice junctions were manually removed to facilitate this visualization in IGV. Although high-confidence peptides and RNA-seq reads validated the two alternatively spliced isoforms of the human microtubule-associated protein 4, the Cufflinks sequence assembly program did not detect both isoforms.

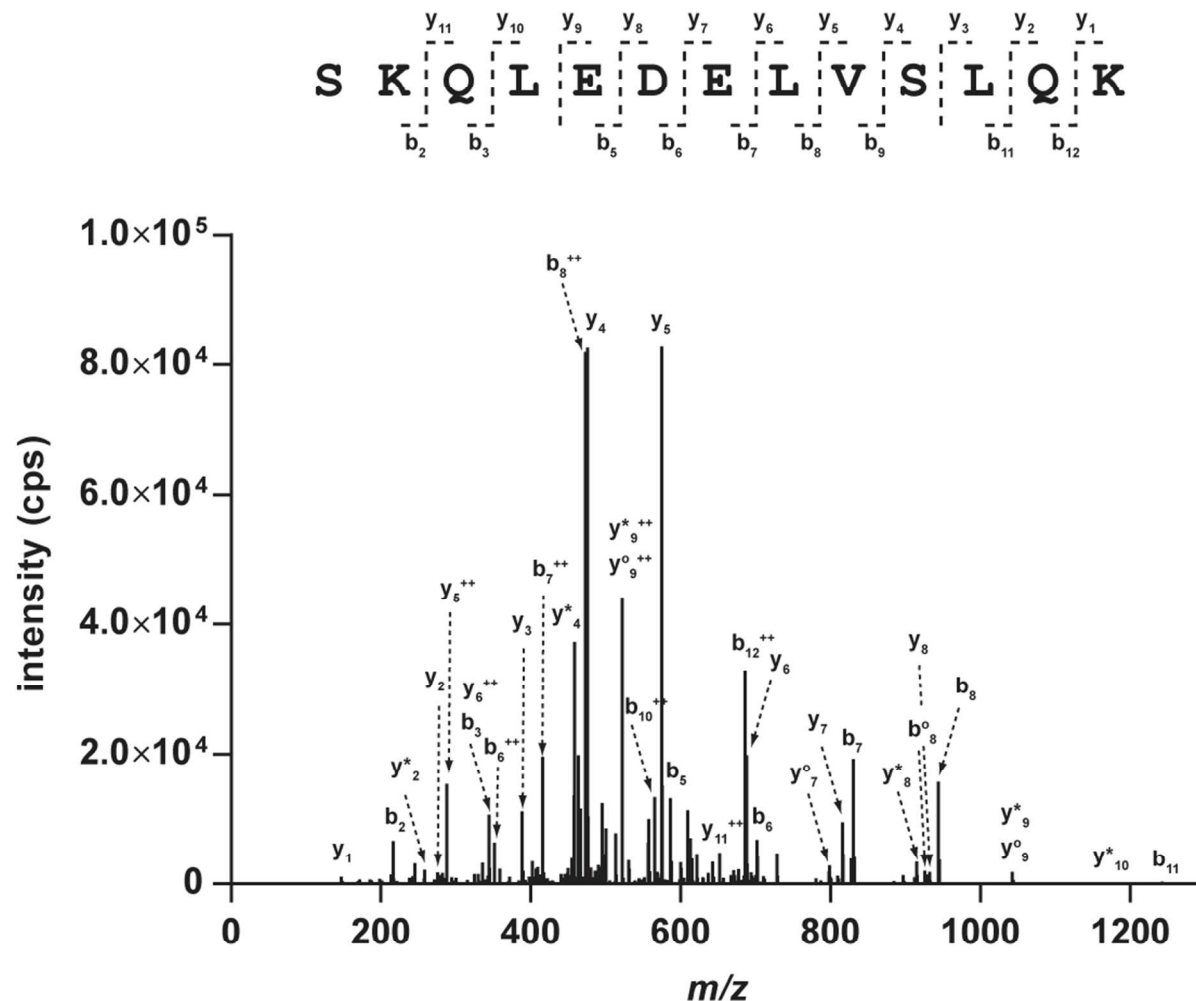

**Notes:**

<sup>1</sup>Doubly charged ions are denoted by (++)

<sup>2</sup>Ions formed after a neutral loss of NH<sub>3</sub> are denoted by (\*)

<sup>3</sup>Ions formed after a neutral loss of H<sub>2</sub>O are denoted by (°)

**Supplementary Figure 3. CID-MS/MS spectrum of a peptide of sequence SKQLEDELVSLQK.** This peptide was observed as a triply-charged ion at 506.2787 m/z, and identified with a Mascot ion score of 61 (E-value = 1.7×10<sup>-5</sup>). Observed b and y ions and their derivatives are labeled in the spectrum. The associated fragment ion coverage is summarised in the illustrated peptide sequence.



2. Delcher AL, Bratke KA, Powers EC, Salzberg SL: Identifying bacterial genes and endosymbiont DNA with Glimmer. *Bioinformatics (Oxford, England)* 2007, 23(6):673-679.
